# Supplementary material for: Detection of Haplotypes Associated with Prenatal Death in Dairy Cattle and Identification of Deleterious Mutations in GART, SHBG and SLC37A2
Source: PLoS One. 2013 Jun 7;8(6):e65550. doi: 10.1371/journal.pone.0065550 (PMC3676330; doi:10.1371/journal.pone.0065550)
Supplement: Document S1 — Details on the haplotypes in the HH4 region and their linkage with the candidate mutations. For each marker of the Illumina Bovine 50 k Beadchip, alleles A and B are denoted 1 and 2, respectively. Haplotypes HH4, MH1 and MH2 are underlined. (XLS) [file pone.0065550.s004.xls]

## Sheet: Analysis_for_HH4
Haplotypes	Number of haplotypes represented within the 72 bull genotyped	Frequency in percent in the whole dataset	Comment
2222222121112121122_A_21112121111211221222212112222_G_22221221222211221112	45	20.26
1221122122112211122_A_22222121211211112211212222112_G_22222221222212122222	22	13.12
1222211122212121222_A_22212122211211112211212221221_G_22221121221111212222	16	12.11
2222211122212111122_A_22111212221211112212222221222_G_12221121122121221222	3	4.75
1222211122212121222_A_22212122211211112211212221221_G_12221121221111212222	1	3.30
1222222122112121122_A_22222121211211112211212221222_G_12222221221112111111	1	3.16
1222222122112121111_C_12222121211211112211212221112_A_12122221221111222222	3	3.13	Haplotype including HH4
2121122112112211111_A_11112212221211122211222212222_G_22221211222111212222	4	1.96
1122222122121121122_A_22222121211211112211212221222_G_22221221222212121112	1	1.83
1222211122112121222_A_22222212221211112212222221222_G_22211111222211211112	3	1.25
1222211122212121222_A_22212122211211112211212221221_G_22221121222212122222	3	0.98
2222212122221121122_A_22222122222111222222222221112_G_12121112222212111111	6	0.94
2212122122112122122_A_22212121211211112211212221221_G_12221211122111222222	1	0.78
1121122122112121111_A_12222121211211112211212222112_G_22222221222211211112	1	0.76	Haplotype sharing an IBD segment with the precedent haplotype
2222222122221121122_A_22222212221211112212222221222_G_22211221222121222222	1	0.73
2212222122212211122_A_22122211211211112211212212112_G_12221121222112122222	1	0.71
2222222122112121122_A_22222212221211221222212112222_G_12121111222112122222	6	0.65
1222211122212121222_A_22212122212111222222222221112_G_12121112222212111111	4	0.62
1222122122112211222_A_21112122221211112211212221222_G_22221221222121222222	2	0.51
1222222122212221122_A_22222122221211112211212221222_G_12221121221111212222	1	0.46
2222122122212221122_A_22222121211211112211212221111_G_22221211212212121112	1	0.37
1222211122112121122_A_22222121212211112211222221112_A_12221112222212121222	1	0.36
2122122122221121122_A_22222212221211112212222221222_G_22211111222212112222	3	0.33
1222211122212221111_A_12121211212111221121212221221_G_12221211122212122222	2	0.29
1222122122112121122_A_22222121211211112212222221222_G_12212221222212122222	1	0.29
2222222121112121122_A_21112121111211221222212112222_G_22221221222211211112	1	0.29
1222122122212221122_A_22122121211211112211212222222_G_12221221222121222222	1	0.26
2122211121111121111_A_12112211211111221221212212222_G_12221211212212121112	1	0.23
2212222122112121111_A_12222122221211112212222121222_G_22221121212121222222	1	0.13
2121211112112122111_A_12111211211211112211212221222_G_12122221222112122112	1	0.11
2222222122112121222_A_22222212221211112212222221222_G_22211111222211211112	1	0.07
1221122122112211122_A_22222121211211112211212222112_G_22222221222211221112	1	0.03
1122222122221121122_A_22221122222112221222212112222_G_22221221222121222222	1	0.02
1222222122112121122_A_22222121211211112211212221111_G_22221211212212121112	2	0.01
1122222122221121122_A_22222121212211112211222221112_A_12221211212212121112	1	0.01
Total	144	74.80

## Sheet: Marker_name_&_pos_HH4_Analysis
Position within haplotype	Marker_Name	Internal_ID	BTA	Position on UMD3. 1 assembly
1	Hapmap43437-BTA-101873	F0100190	1	135098
2	ARS-BFGL-NGS-16466	F0100220	1	267940
3	ARS-BFGL-NGS-105096	F0133440	1	353745
4	Hapmap34944-BES1_Contig627_1906	F0100250	1	393248
5	ARS-BFGL-NGS-98142	F0100270	1	471078
6	Hapmap53946-rs29015852	F0100280	1	516404
7	ARS-BFGL-NGS-114208	F0100300	1	533815
8	ARS-BFGL-NGS-66449	F0100290	1	571340
9	ARS-BFGL-BAC-7196	F0133450	1	654413
10	ARS-BFGL-BAC-32770	F0100310	1	845494
11	ARS-BFGL-NGS-65067	F0100320	1	883895
12	ARS-BFGL-BAC-32722	F0100340	1	929617
13	ARS-BFGL-BAC-34682	F0100350	1	950841
14	ARS-BFGL-NGS-98203	F0100370	1	1009504
15	ARS-BFGL-BAC-2376	F0100400	1	1114422
16	ARS-BFGL-BAC-31722	F0100420	1	1189382
17	BTA-49284-no-rs	F0100430	1	1209308
18	ARS-BFGL-BAC-6557	F0100440	1	1234172
19	ARS-BFGL-BAC-7196	F0100450	1	1264369
20	g.1277227A>C	g.1277227A>C	1	1277227
21	ARS-BFGL-BAC-649	F0100470	1	1312323
22	ARS-BFGL-BAC-14857	F0100480	1	1336351
23	Hapmap53766-ss46526150	F0100490	1	1359951
24	ARS-BFGL-NGS-115971	F0100500	1	1385605
25	ARS-BFGL-NGS-62826	F0100510	1	1436503
26	BTA-39394-no-rs	F0100520	1	1513277
27	ARS-BFGL-NGS-109301	F0100530	1	1543411
28	ARS-BFGL-NGS-105306	F0100540	1	1582828
29	ARS-BFGL-NGS-87636	F0100550	1	1603944
30	ARS-BFGL-NGS-39992	F0100570	1	1668494
31	ARS-BFGL-BAC-13059	F0100600	1	1760113
32	ARS-BFGL-BAC-14930	F0100610	1	1782724
33	ARS-BFGL-BAC-15552	F0100620	1	1805584
34	ARS-BFGL-BAC-15580	F0100630	1	1828653
35	ARS-BFGL-NGS-11433	F0100640	1	1851399
36	ARS-BFGL-NGS-25183	F0100650	1	1896112
37	ARS-BFGL-NGS-76349	F0100660	1	1921756
38	ARS-BFGL-BAC-16253	F0100670	1	1953465
39	ARS-BFGL-BAC-7317	F0100680	1	1983902
40	ARS-BFGL-NGS-29653	F0100700	1	2049400
41	ARS-BFGL-BAC-14982	F0100710	1	2089647
42	BTA-120704-no-rs	F0100720	1	2128924
43	ARS-BFGL-BAC-6733	F0100730	1	2173375
44	ARS-BFGL-NGS-85297	F0100740	1	2211567
45	ARS-BFGL-NGS-16727	F0100750	1	2291153
46	ARS-BFGL-NGS-115671	F0100760	1	2313042
47	ARS-BFGL-NGS-71085	F0100770	1	2393763
48	ARS-BFGL-NGS-21352	F0100780	1	2415018
49	ARS-BFGL-NGS-103391	F0100790	1	2462297
50	g.2490314G>A	g.2490314G>A	1	2490314
51	ARS-BFGL-NGS-17308	F0100810	1	2550992
52	ARS-BFGL-NGS-92033	F0100820	1	2582894
53	ARS-BFGL-NGS-89044	F0100830	1	2645246
54	ARS-BFGL-NGS-79093	F0100840	1	2676888
55	ARS-BFGL-NGS-58892	F0100850	1	2714141
56	ARS-BFGL-NGS-98287	F0100860	1	2749920
57	BTB-00001612	F0100870	1	2771830
58	Hapmap53592-rs29009975	F0100880	1	2799458
59	ARS-BFGL-NGS-15775	F0100890	1	2847001
60	ARS-BFGL-NGS-59192	F0100900	1	2886955
61	BTB-00001299	F0100920	1	2942947
62	ARS-BFGL-NGS-37412	F0100930	1	2977063
63	ARS-BFGL-NGS-16784	F0100940	1	3010948
64	BTB-02081949	F0100950	1	3079342
65	BTB-00001074	F0100960	1	3116101
66	ARS-BFGL-NGS-43924	F0100970	1	3148834
67	ARS-BFGL-NGS-30999	F0100980	1	3197378
68	Hapmap57114-rs29012843	F0101000	1	3248926
69	ARS-USMARC-Parent-DQ381153-rs29012842	F0101010	1	3249057
70	ARS-BFGL-NGS-37505	F0101020	1	3295844

## Sheet: Analysis_for_MH1
Haplotypes	Number of haplotypes represented within the 18 bull genotyped	Frequency in percent in the whole dataset	Comment
111_C_121221221111221222221212	5	16.04
211_C_221221221111221222222112	6	12.49
211_C_112111111211221222212111	4	12.12
212_T_221211111211221121112112	4	8.96	Haplotype MH1
112_C_221211221122221222222112	3	5.71
111_C_212121221111221222222112	2	5.14
212_C_121221221111121222221212	2	4.66
112_C_212121221111221222122112	1	4.09
112_C_212121221111221222212121	1	3.34
211_C_221121111211221122122112	2	3.19
111_C_121221221111221222212112	1	3.04
212_C_221211121122221222122211	1	1.46
212_C_221211111222221222222112	1	0.70
212_C_221121221111121222221212	1	0.42
212_C_221221121122221222112122	2	0.16
Total	36	81.52

## Sheet: Marker_name_&_pos_MH1_Analysis
Position within haplotype	Marker_Name	Internal_ID	BTA	Position on UMD3 1 assembly
1	Hapmap51730-BTA-44937	F1905290	19	27643677
2	ARS-BFGL-NGS-18463	F1905310	19	27706098
3	ARS-BFGL-NGS-88422	F1905370	19	27965234
4	g.27956790C>T	g.27956790C>T	19	27956790
5	ARS-BFGL-NGS-100899	F1905410	19	28095023
6	BTA-44713-no-rs	F1905440	19	28204745
7	ARS-BFGL-NGS-119468	F1905470	19	28342107
8	ARS-BFGL-NGS-101671	F1905480	19	28366979
9	ARS-BFGL-NGS-95155	F1905500	19	28450297
10	BTB-01692321	F1905510	19	28484744
11	ARS-BFGL-NGS-31543	F1905530	19	28545943
12	ARS-BFGL-NGS-103553	F1905540	19	28595703
13	ARS-BFGL-NGS-109195	F1905550	19	28629120
14	Hapmap54918-rs29023719	F1905560	19	28677989
15	BTB-00745293	F1905580	19	28738511
16	BTB-00745347	F1905590	19	28768067
17	BTB-00745391	F1905600	19	28804007
18	ARS-BFGL-NGS-81151	F1905630	19	28920096
19	ARS-BFGL-NGS-81552	F1905650	19	28984588
20	ARS-BFGL-NGS-73716	F1905660	19	29020067
21	ARS-BFGL-NGS-115178	F1905670	19	29048973
22	ARS-BFGL-NGS-43359	F1905690	19	29152662
23	ARS-BFGL-NGS-6931	F1905700	19	29192454
24	ARS-BFGL-NGS-18515	F1905710	19	29219211
25	ARS-BFGL-NGS-79203	F1905720	19	29279305
26	ARS-BFGL-NGS-105454	F1905730	19	29325678
27	ARS-BFGL-NGS-17187	F1905740	19	29349255
28	ARS-BFGL-NGS-111936	F1905750	19	29383514

## Sheet: Analysis_for_MH2
Haplotypes	Number of haplotypes represented within the 18 bull genotyped	Frequency in percent in the whole dataset	Comment
121211211121112221_C_2212112	4	12.73
111211221122221222_C_2212222	2	11.25
211111211121112212_C_2212222	2	8.26
121111221111112212_C_2212211	3	7.46
121111211111112222_T_2212211	5	7.02	Haplotype MH2
121211211122222222_C_2112222	3	5.53
221211211122221212_C_2122112	2	4.94
121222212112112121_C_2212211	2	4.22
121111211121112221_C_2212222	2	3.88
121211211122221212_C_2211222	1	3.65
121111211212112122_C_2212222	2	3.16
111122221122222112_C_2212212	1	2.98
121211221111112221_C_2212112	1	2.79
121222211212112122_C_2212211	1	1.10
121111211122221212_C_1122222	1	0.95
121111211111112222_C_2112222	1	0.80
121222212112112121_C_2212122	1	0.62
121211212112112121_C_2212211	1	0.42
121222211212112122_C_2212222	1	0.35
Total	36	82.10

## Sheet: Marker_name_&_pos_MH2_Analysis
Position within haplotype	Marker_Name	Internal_ID	BTA	Position on UMD3 1 assembly
1	BTB-01337464	F2905400	29	27965621
2	Hapmap60860-rs29018127	F2905410	29	28147351
3	ARS-BFGL-NGS-17874	F2905420	29	28170104
4	ARS-BFGL-NGS-14500	F2905430	29	28192104
5	Hapmap42619-BTA-65257	F2905440	29	28224030
6	Hapmap45305-BTA-65247	F2905450	29	28248785
7	BTA-65245-no-rs	F2905460	29	28325008
8	ARS-BFGL-NGS-117926	F2905480	29	28483133
9	ARS-BFGL-NGS-94355	F2905490	29	28523337
10	Hapmap54158-rs29026721	F2905500	29	28559588
11	ARS-BFGL-NGS-43380	F2905510	29	28600601
12	ARS-BFGL-NGS-110327	F2905520	29	28621321
13	ARS-USMARC-Parent-EF034080-rs29024749	F2905530	29	28647816
14	Hapmap36059-SCAFFOLD50303_4748	F2905540	29	28647816
15	Hapmap40781-BTA-65234	F2905550	29	28702318
16	ARS-BFGL-NGS-1125	F2905560	29	28754014
17	BTB-01017247	F2905570	29	28809817
18	BTB-01017180	F2905580	29	28849610
19	g.28879810C>T	g.28879810C>T	29	28879810
20	ARS-BFGL-NGS-37244	F2905590	29	28887293
21	ARS-BFGL-NGS-102700	F2905600	29	28908928
22	ARS-BFGL-NGS-18412	F2905610	29	28930002
23	ARS-BFGL-NGS-79220	F2905620	29	28967249
24	ARS-BFGL-NGS-118467	F2905630	29	29030950
25	UA-IFASA-5034	F2905640	29	29052623
26	ARS-BFGL-NGS-23652	F2905650	29	29099593
